# Supplementary material for: Electrochemical Impedance Spectroscopy Microsensor Based on Molecularly Imprinted Chitosan Film Grafted on a 4-Aminophenylacetic Acid (CMA) Modified Gold Electrode, for the Sensitive Detection of Glyphosate
Source: Frontiers journal article supplement (doi:10.3389/fchem.2021.621057), 2021-05-07
Supplement: Data_Sheet_1.PDF [file Data_Sheet_1.PDF]

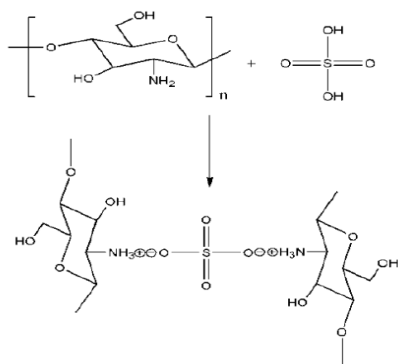

Fig1s: cross linking mechanism of the Cs/H<sub>2</sub>SO<sub>4</sub>
